# Supplementary material for: Rational design of a protein that binds integrin αvβ3 outside the ligand binding site
Source: PubMed Central journal article supplement (PMC4895024; doi:10.1038/ncomms11675), 2016-05-31
Supplement: ncomms11675-s1.pdf [file ncomms11675-s1.pdf]

# Turaga et al., Supplementary Figure 1

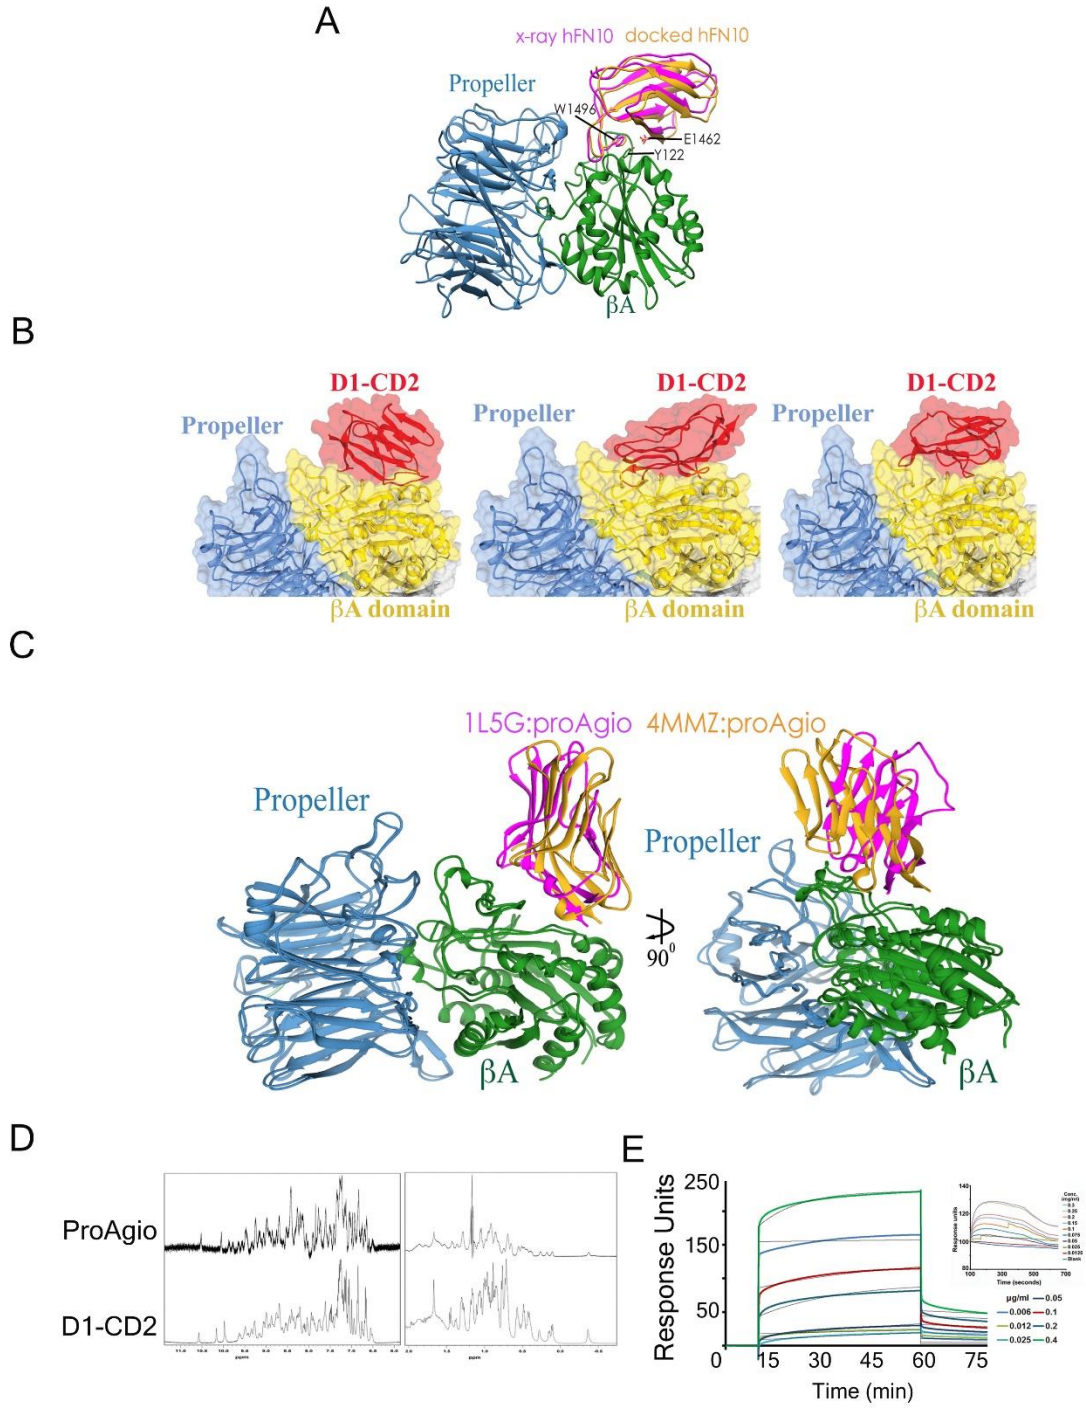

**Supplementary Figure 1 (A), (B), and (C)** Docking of a physiologic ligand of integrin  $\alpha_v\beta_3$ , the tenth type III RGD domain of wild-type fibronectin **(A)**, D1-CD2 **(B)**, and the D1-CD2 variant 3 **(C)** to  $\beta A$ -domain of integrin  $\alpha_v\beta_3$  using software HADDOCK 1.2. In **(A)**, the yellow colored RGD domain is the docking model, while the purple colored RGD domain is crystal structure by Van Agthoven, J. F. and co-workers. In **(B)**, different models in various different orientations of D1-CD2 docking at  $\beta A$  groove are shown. In **(C)**, purple color shows ProAgio docking to the crystal structure 1L5G, while yellow color show D1-CD2 variant 3 docking to the crystal structure 4MMZ. Left and right images are same docking model with  $90^\circ$  twist to show the difference in orientation of 1L5G and 4MMZ dockings (yellow and purple). **(D)**  $^1\text{H-NMR}$  spectra of ProAgio and D1-CD2 were recorded using Varian Inova 600 MHz spectrometer. Protein samples were prepared by dilution with 10 mM Tris and 10%  $\text{D}_2\text{O}$  pH = 7.4 to final protein concentration of 200  $\mu\text{M}$ . **(E)** The representative binding curves of binding of PEGylated ProAgio **(Left)** or D1-CD2 **(Right, and smaller panel)** to integrin  $\alpha_v\beta_3$  were monitored by SPR with integrin that were immobilized on the Biacore chip. Thin black lines in left panel are the fitting curves based on one-to-one binding mode.

Turaga et al., Supplementary Figure 2

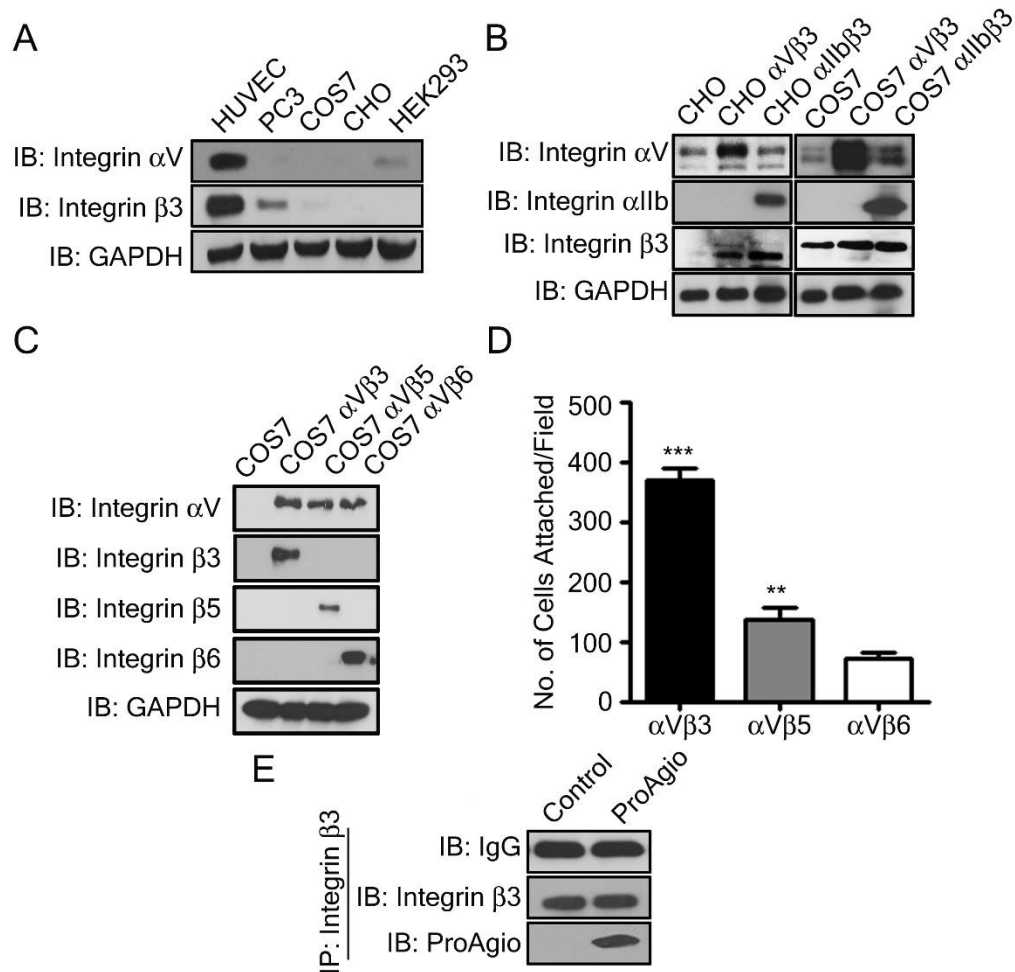

**Supplementary Figure 2 (A) & (B)** The levels of endogenous and exogenous integrin  $\alpha$ V (IB: Integrin  $\alpha$ V),  $\beta$ 3 (IB: Integrin  $\beta$ 3), and  $\alpha$ IIb (IB: Integrin  $\alpha$ IIb) of indicated cells were analyzed by immunoblot of cell lysates. CHO $\alpha$ V $\beta$ 3, CHO $\alpha$ IIb $\beta$ 3, COS7 $\alpha$ V $\beta$ 3, and COS7 $\alpha$ IIb $\beta$ 3 are derived from CHO and COS7 cells with exogenous expression of  $\alpha$ v $\beta$ 3 and  $\alpha$ IIb $\beta$ 3 respectively. **(C)** The levels of exogenous expressed integrin  $\alpha$ V (Integrin  $\alpha$ V),  $\beta$ 3 (Integrin  $\beta$ 3),  $\beta$ 5 (Integrin  $\beta$ 5), and  $\beta$ 6 (Integrin  $\beta$ 6) in COS-7 cells were analyzed by immunoblot of cell lysates from COS7 $\alpha$ V $\beta$ 3, COS7 $\alpha$ V $\beta$ 5, and COS7 $\alpha$ V $\beta$ 6 respectively. **(D)** Attachment of COS7 cells with exogenous expression of integrin  $\alpha$ v $\beta$ 3,  $\alpha$ v $\beta$ 5, and  $\alpha$ v $\beta$ 6 to plate coated with ProAgio. The attachment presented as number of cells attached per microscopic view field. Error bars are standard deviations from measurement of five independent experiments. **(E)** Co-immunoprecipitation of integrin  $\beta$ 3 with ProAgio (IP: Integrin  $\beta$ 3) from the HUVEC cell lysate was examined by immunoblot of ProAgio (IB: ProAgio). The cells were treated with 5  $\mu$ M ProAgio for 6 hours prior to the extracts preparation. IgG indicate the amounts antibody used in IP. Immunoblot of integrin  $\beta$ 3 (IB: Integrin  $\beta$ 3) indicates amount of  $\beta$ 3 was precipitated down in the co-IPs. Immunoblot of GAPDH in **(A)**, **(B)**, and **(C)** are loading controls.

Turaga et al., Supplementary Figure 3

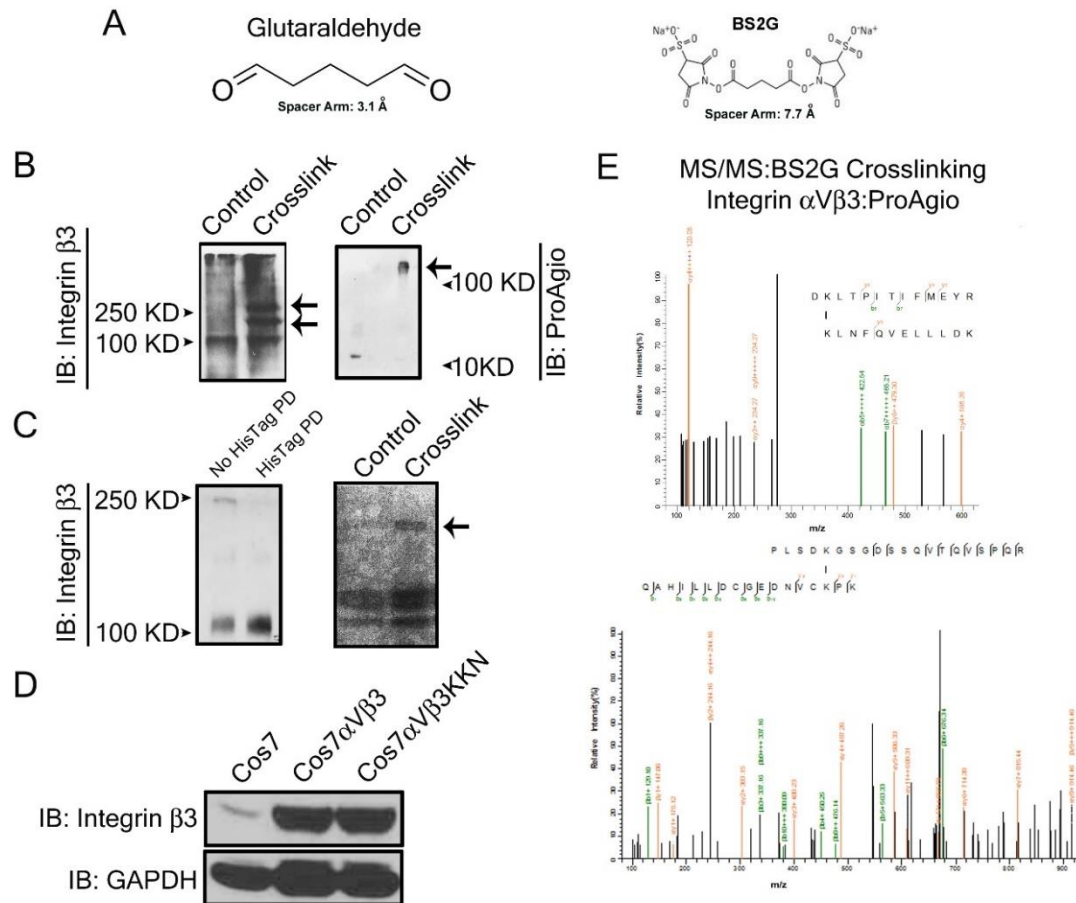

**Supplementary Figure 3** (A) Structure drawing of crosslinking agents BS2G and glutaraldehyde. (B) Crosslink of His-ProAgio with recombinant integrin  $\alpha_v\beta_3$  using BS2G were examined by immunoblots of integrin  $\beta_3$  (IB:  $\beta_3$  Integrin) (Left) and ProAgio (IB:ProAgio) (Right). The controls in both left and right panels are the ProAgio-integrin complex without crosslinking by BS2G. (C) Crosslinks of His-ProAgio with recombinant integrin  $\alpha_v\beta_3$  using glutaraldehyde were examined by Gel-code staining (Right) and immunoblots of integrin  $\beta_3$  (IB:  $\beta_3$  Integrin) (Left). Control in right panel is the ProAgio-integrin complex without crosslinking by glutaraldehyde. Crosslinking mixture were separated by denaturing and His-pull down (His tag PD) or without pull-down (No HisTag PD) prior to electrophoresis and immunoblot. In (B) and (C), arrows indicate the ProAgio-integrin crosslinks. The crosslinked bands were sliced out and subjected to trypsin digestion and followed M/S analyses. (D) Expression of integrin  $\alpha_v\beta_3$  wild type (COS7 $\alpha_v\beta_3$ ) and  $\beta_3$ -KKN mutant (COS7 $\alpha_v\beta_3$  KKN) in COS7 cells were examined by immunoblots of integrin  $\beta_3$  (IB:Integrin  $\beta_3$ ). Immunoblot of GAPDH (IB:GAPDH) is a loading control. (E) Call-out regions ms/ms (top, ProAgio-integrin crosslinking, middle and bottom, integrin-integrin crosslinking) of the MS spectrum (MS2) of peptide fragments resultant from trypsin digestion of crosslinks of His-ProAgio with integrin  $\alpha_v\beta_3$  using BS2G. The sequence on top is derived sequences using pLink based on ms/ms of the crosslinked peaks.

Turaga et al., Supplementary Figure 4

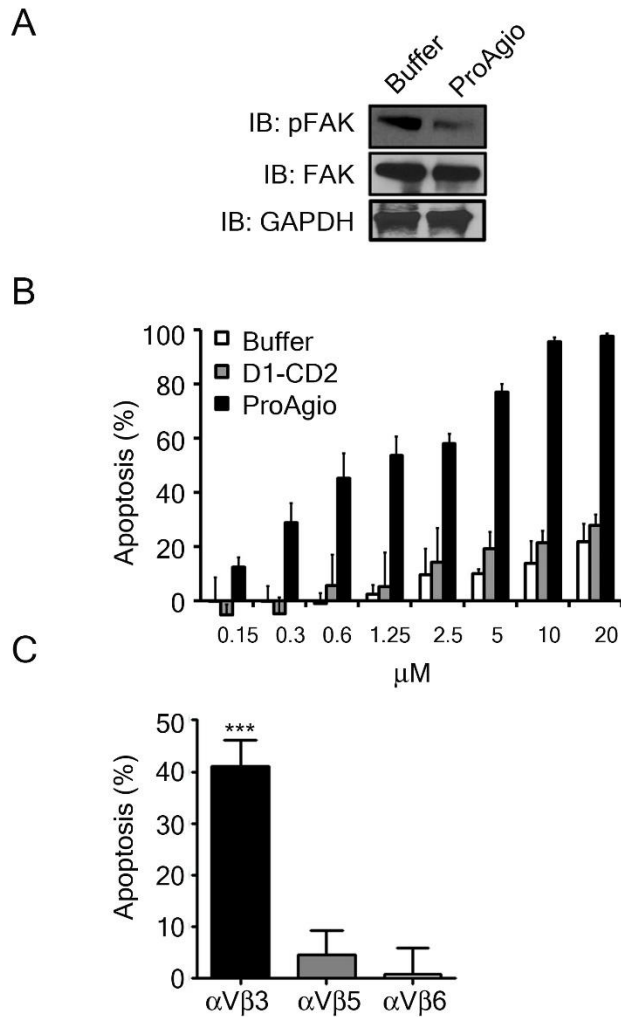

**Supplementary Figure 4 (A)** Cellular levels of phosphorylated FAK in HUVEC cells were examined by immunoblot (IB: pFAK). The cells were treated by indicated agents. Immunoblot of FAK (IB: FAK) indicates the levels of total cellular FAK. Immunoblot of GAPDH is a loading control. **(B)** Apoptosis of HUVEC cells was measured by apoptosis kit 10 hours after treatment with different concentrations of ProAgio or D1-CD2. Cell apoptosis is presented as Apoptosis (%) by defining the apoptosis of untreated cells as reference 0% apoptosis. **(C)** Apoptosis of COS7 cells with exogenous expression of integrin  $\alpha\text{V}\beta\text{3}$ ,  $\alpha\text{V}\beta\text{5}$ , and  $\alpha\text{V}\beta\text{6}$  in the presence of 3  $\mu\text{M}$  ProAgio was measured by cell apoptosis kit. Cell apoptosis is presented as Apoptosis (%) by defining the apoptosis of untreated cells as reference 0% apoptosis. Error bars in **(B)** and **(C)** are standard deviations from measurement of five independent experiments.

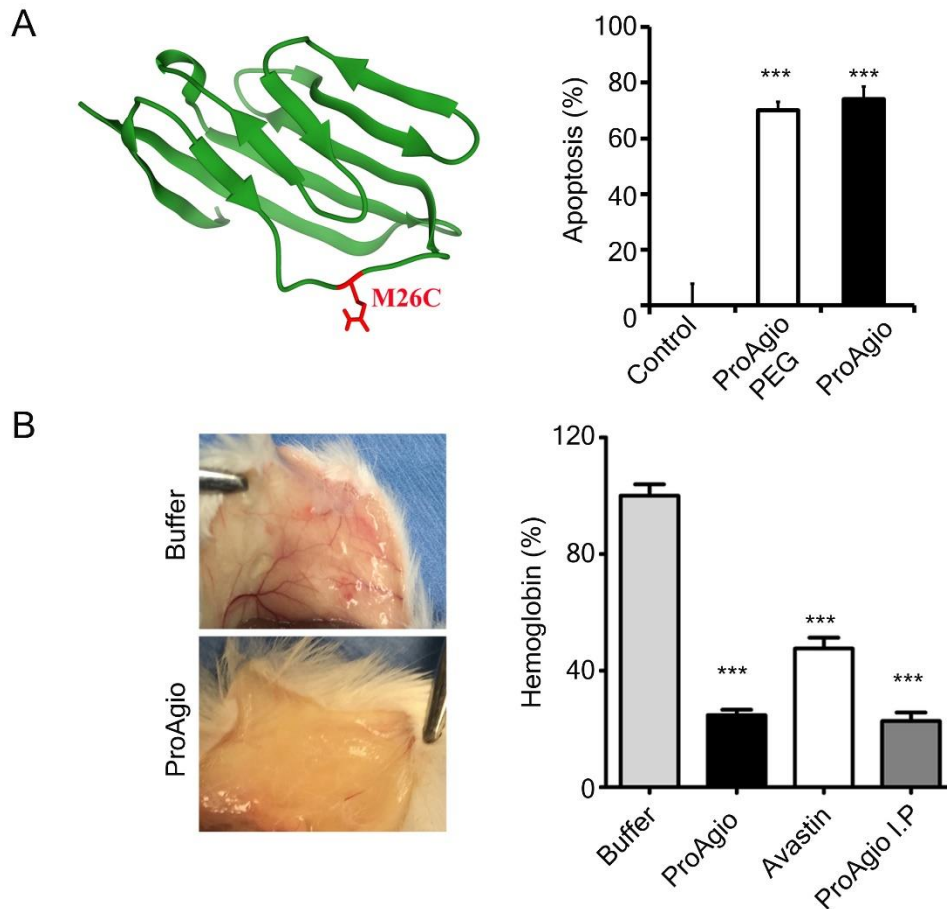

**Supplementary Figure 5 (A) (Left)** Model structure of ProAgio. Red color indicates the position of introduced Cys residue for PEGylation. **(Right)** Apoptosis of HUVEC cells was measured by cell counting 24 hours after treatment with buffer, ProAgio, or ProAgio-PEG. Cell apoptosis is presented as % apoptosis by defining the apoptosis of untreated cells as 0%. **(B)** Matrix-gel plug assay, 400  $\mu$ l of matrix-gel in mixing with indicated agents was s.c. implanted on the right flank of Balb/c mice. The matrix-gel Geltrex<sup>TM</sup> was pre-mixed with other components suggested by vendor before addition of the indicated agents. After two weeks, pictures of the matrix-gel insertion site were taken. **(Left)** are representative images of the matrix-gel plugs in mix with either ProAgio or buffer saline. **(Right)**, quantitation of angiogenesis in implanted matrix-gels, the matrix-gels were retrieved from the mice. The hemoglobin contents in the matrix-gel plagues were analyzed by standard method, and presented as relative hemoglobin content by defining the hemoglobin levels of buffer gel plague as 100%. ProAgio IP means the ProAgio was administered by i.p. injection (5 mg/kg one dose every two days) instead of pre-mix with matrigel. Error bars are standard deviations from measurement of five independent experiments.

Turaga et al., Supplementary Figure 6

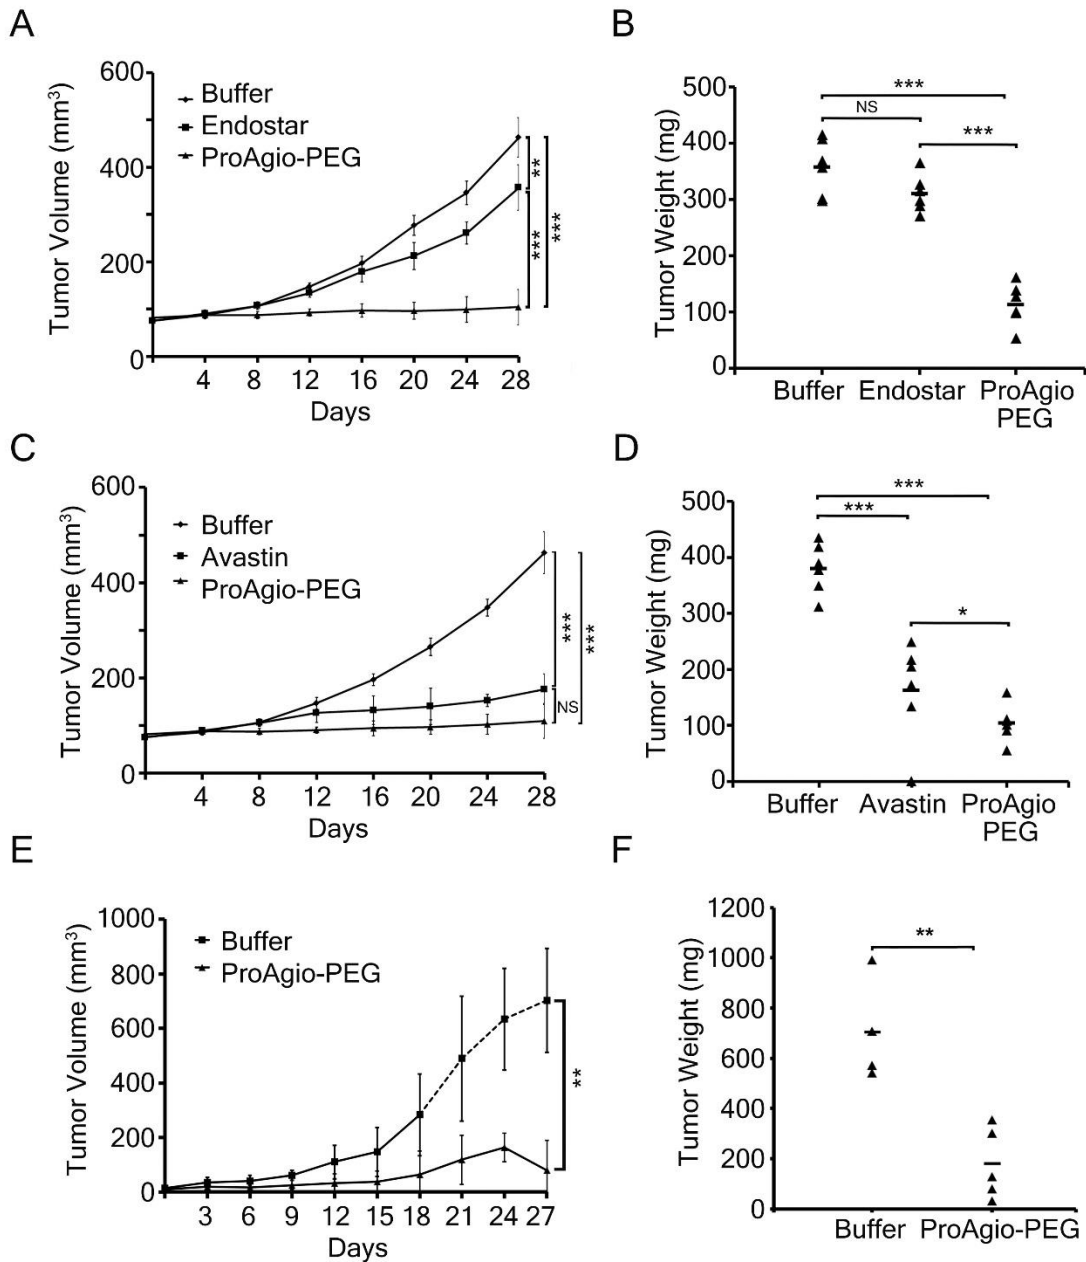

**Supplementary Figure 6** Growth of xenograft PC-3 tumors (A), (B), (C), and (D) or orthotopic 4T-1 tumors (E) and (F) under the treatment of indicated agents was monitored by; (A), (C), and (E) growth curve by measuring tumor volumes every four days, or (B), (D), and (F) endpoint weights of the harvested tumors. Treatments started 5 days post tumor inoculations. In (F), one tumor completely disappeared in ProAgiro treatment group. The dot line in (E) in the growth curve is due to extra-large size of tumors that led to pre-termination of experiment (per IACUC regulation). The pre-terminated tumors were not included in both growth curve and final tumor weights. Error bars are standard deviations from measurement of six mice.



Turaga et al., Supplementary Figure 7

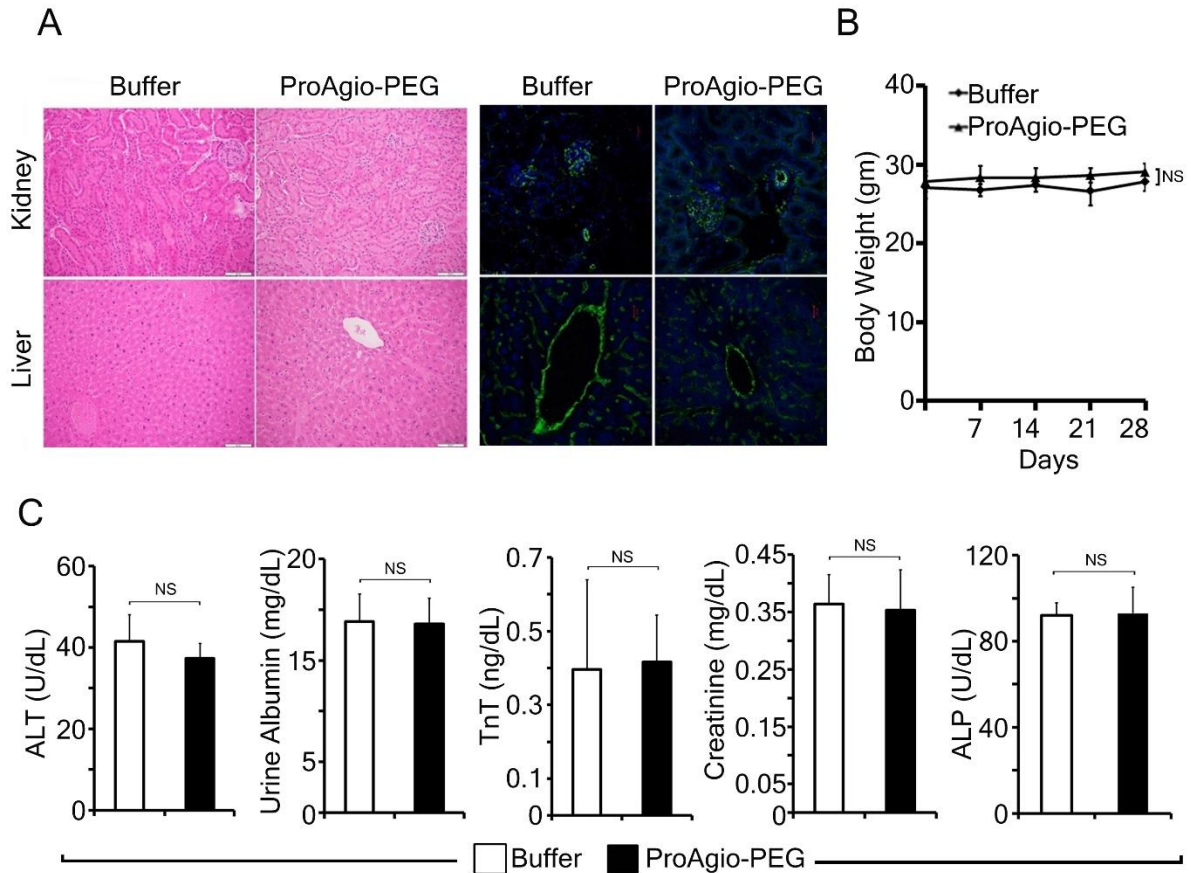

**Supplementary Figure 7 (A)** Represent images of Hematoxylin staining (**Left**) and IF staining using anti- mouse/CD31 antibody (**Right**) of tissue sections of kidney and liver collected from the mice that were treated with ProAgiio-PEG 20 mg/kg (10 doses for 20 days) or buffer. The images are typical of stains of at least two view fields of four sections from each organs. **(B)** Body weights of tumor-bearing mice were measured every four days during the treatments with ProAgiio-PEG 20 mg/kg (10 doses for 20 days) or buffer. **(C)** Plasma levels of ALT, ALP, Creatine, and TnT, and urine levels of albumin were measured using corresponding commercially available kits. Mouse blood and urine samples were collected from CD-1 mice 48 hours after treatment with three doses of 60 mg/kg ProAgiio-PEG or buffer. Error bars in **(B)** and **(C)** standard deviations from measurement of six mice.



Turaga et al., Supplementary Figure 8

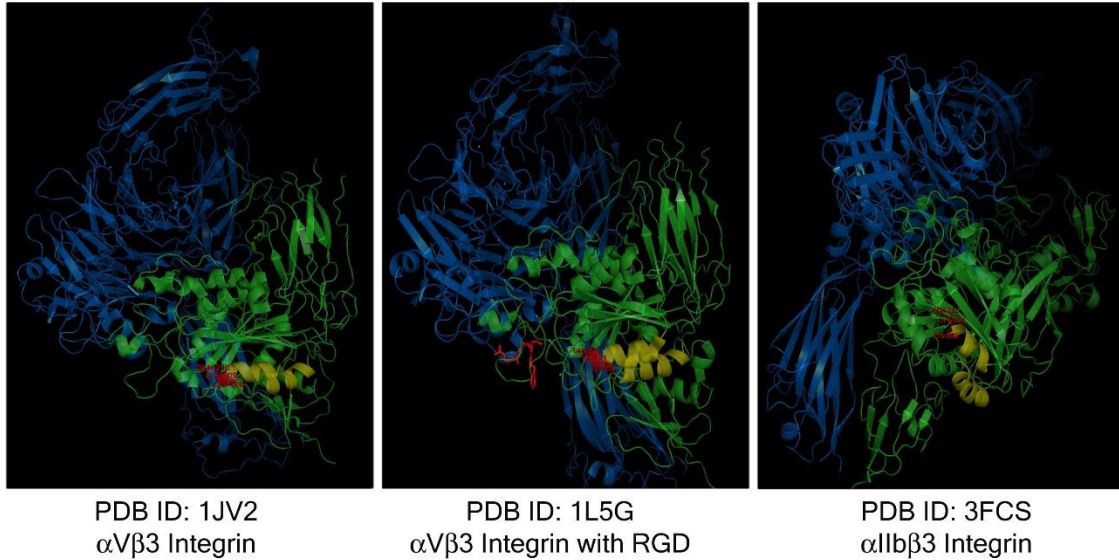

**Supplementary Figure 8** Structure features of the  $\beta$ -groove and nearby regions of integrin  $\alpha$ v $\beta$ 3 with/without RGD binding (**Left and middle**) and  $\alpha$ IIb $\beta$ 3 (**Right**). The structures in figures are adopted from the indicated PDB files in protein structure data bank.

ProAgio antibody testing

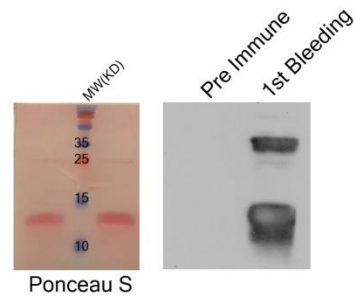

**Supplementary Figure 9** Screening of the antibody generated against ProAgio in rabbit. Left panel indicate the ponceau staining, right panel indicate the corresponding western blot for pre immune and 1st bleed. 1:2000 dilution of generated ProAgio antibody was used to perform the western blot.

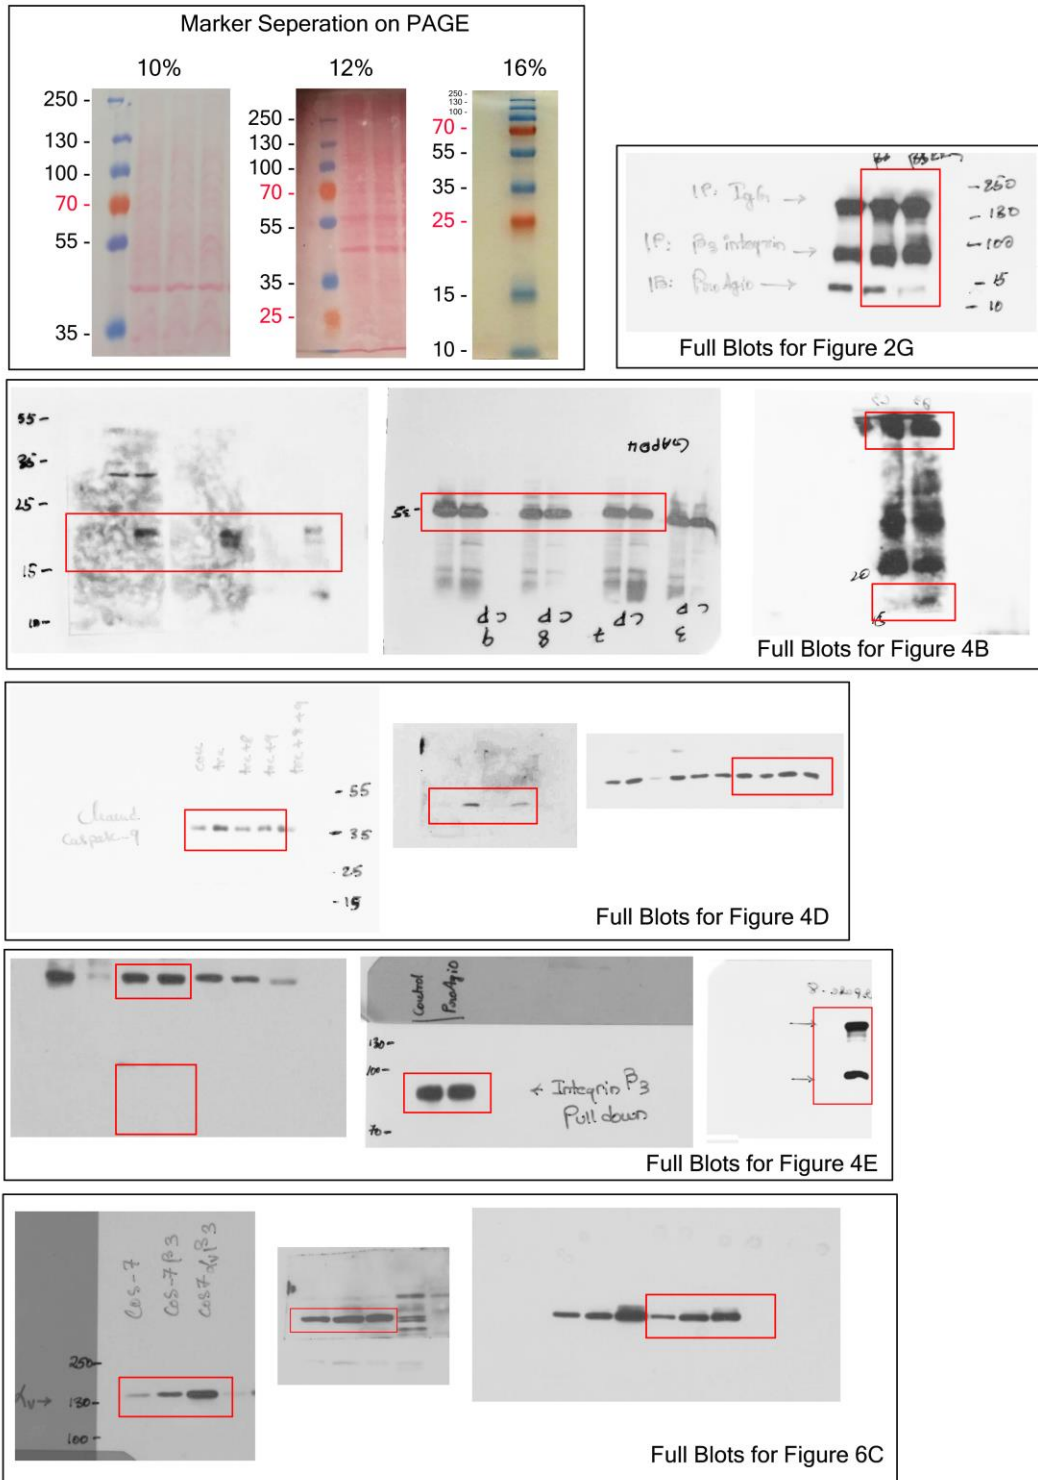

Supplementary Figure 10 Complete western blots of the main figure 2, figure 4 and figure 6

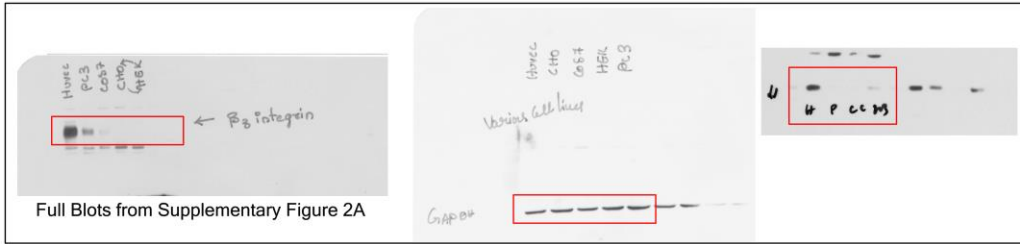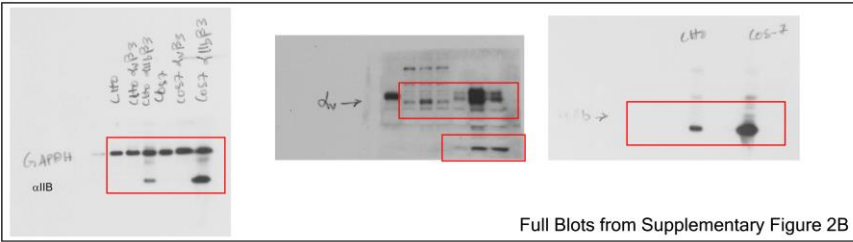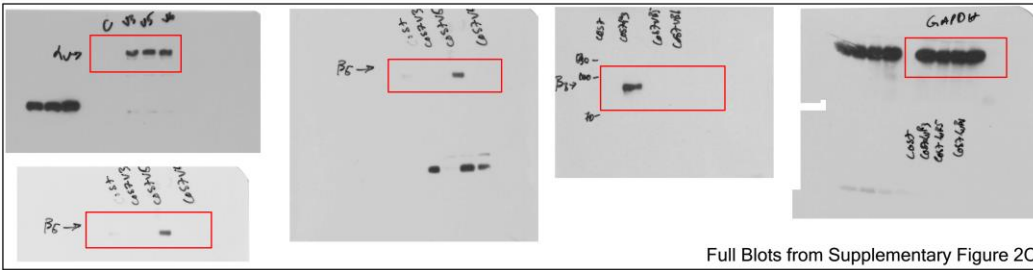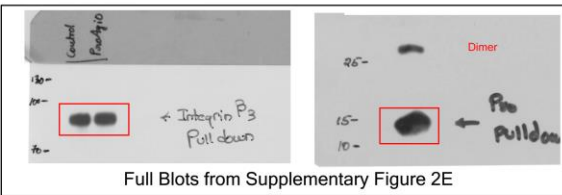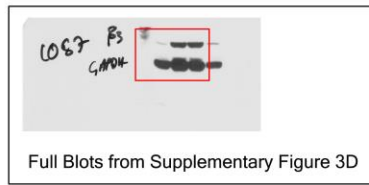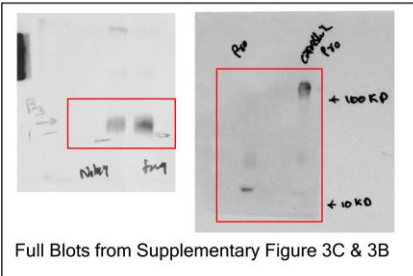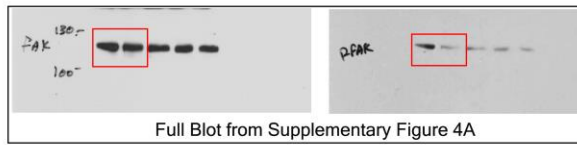

**Supplementary Figure 11** Complete western blots of the supplementary figures 2, 3 and 4.

Turaga et al., Supplementary Table 1

|                                         | Buffer         | Endostar      | Avastin         | ProAgio        |
|-----------------------------------------|----------------|---------------|-----------------|----------------|
| V-Length ( $\mu\text{M}$ ) <sup>#</sup> | 1328.6 +/- 157 | 1039 +/- 170* | 564.6 +/- 145** | 260 +/- 79***  |
| MVD <sup>##</sup>                       | 16.8 +/- 1.8   | 14.3 +/- 1.3* | 8.5 +/- 2.1**   | 5.5 +/- 1.3**  |
| BP                                      | 8.4 +/- 2.0    | 8.0 +/- 1.7*  | 2.3 +/- 1***    | 0.5 +/- 0.2*** |

**Supplementary Table 1:** CD31 Quantification of PC3 xenograft tumors treated with Buffer (PBS), Endostar, Avastin and ProAgio (n = 6). 5 sections from each tumor was stained and quantified. Quantification was performed for vessel length, mean vessel density (MVD) and branch points (BP) using ImageJ software.

## Turaga et al., Supplementary Table 2

|   | Mass (Da) | Peptides                                        | Regions                                                | $\delta$ ppm |
|---|-----------|-------------------------------------------------|--------------------------------------------------------|--------------|
| 1 | 1225.6321 | KFDR-KFDR                                       | $\alpha$ V $\beta$ 3(619) - $\alpha$ V $\beta$ 3(619)  | 1.63         |
| 2 | 2233.2514 | IRSKVELEVR-KEKETFK                              | $\alpha$ V $\beta$ 3 (354) - ProAgi(50)                | 1.66         |
| 3 | 1283.7811 | QKGAIR - LKQK                                   | $\alpha$ V $\beta$ 3 (505) - $\alpha$ V $\beta$ 3(503) | 1.41         |
| 4 | 4663.2408 | VLEDRPLSDKSGSDSSQVTQVSPQR-<br>QAHILLDCGEDNVCKPK | $\alpha$ V $\beta$ 3(72) - $\alpha$ V $\beta$ 3(603)   | 6.82         |
| 5 | 2037.9879 | WEKTSDDK-TEMKQER                                | ProAgi(42) - $\alpha$ V $\beta$ 3(119)                 | 1.47         |
| 6 | 3181.7315 | DKLTPITIFMEYR-KLNQVELLLDK                       | $\alpha$ V $\beta$ 3 (551) - $\alpha$ V $\beta$ 3(490) | 3.11         |
| 7 | 2856.5971 | EKSFTIKPVGFK-EKSFTIKPVGFK                       | $\alpha$ V $\beta$ 3(417) - $\alpha$ V $\beta$ 3(417)  | 2.17         |
| 8 | 2124.0699 | LEVSVDSDQK-KEKETFK                              | $\alpha$ V $\beta$ 3(605) - ProAgi (50)                | 842.21       |

Integrin  $\alpha$ V $\beta$ 3: ProAgi:: 1 : 0.7

$$ppm = 1.0 \times 10^6 \frac{(\text{measured mass} - \text{theoretical mass})}{\text{theoretical mass}}$$

**Supplementary Table 2:** Mass of the crosslinked peptides identified using pLink and corresponding regions in integrin  $\alpha$ V $\beta$ 3. Integrin  $\alpha$ V $\beta$ 3 and ProAgi were crosslinked at 1:0.7 ratio.  $\delta$ PPM is determined using the formula above mentioned.
